# Supplementary material
Source: publisher figshare collection journal article supplement (https://sage.figshare.com/ndownloader/files/18716045)
Supplement: Supplementary file 1 [file 18716045]

## Supplementary Materials 1

### *Study 1 - Motivations for Revising the Initial Decision*

In Study 1, participants were also provided with the (false) information that both speakers they had listened to were gay, and were then offered to revise their initial decision (“*Would you still make the same choice to give a child in adoption to this person you had chosen earlier?*”) and to provide a motivation for their response.

Results showed that, after being told that both speakers were gay, the majority of 87 participants who completed this measure ( $n = 71$ , 81.60%) confirmed their previous choice. The remaining 16 participants (18.40%) decided that they would not give a child in adoption to that speaker after finding out that the speaker was gay. Interestingly, the majority of those who revised their initial choice ( $n = 12$ ) had originally chosen the straight speaker, compared to only 4 who had originally chosen the gay speaker ( $n = 4$ ), binomial  $p = .077$ . The open-ended answers were coded into two categories: anti-gay adoption (e.g., children need a mother and a father;  $Kappa = .955$ ) and pro-gay adoption beliefs ( $Kappa = .914$ ). Compared to those who maintained their preference, straight participants who decided to revise their original choice motivated it on the basis of anti-gay adoption beliefs (10 vs. 1;  $p = .046$ , Fisher’s exact test). The straight participants who maintained their decision motivated it on the basis of pro-gay adoption beliefs (23 vs. 0;  $p = .001$ , Fisher’s exact test).

## Supplementary Materials 2

When the source of information was entered in the analysis, a significant interaction between source and speakers emerged only on perceived warmth, indicating that the gay-sounding speaker ( $M = 4.97$ ,  $SD = 1.21$ ) was perceived as warmer than the straight one ( $M = 4.33$ ,  $SD = 1.30$ ) in the condition where speakers uttered an adoption-related content ( $p = .004$ ), but not when the sentence content was neutral (gay:  $M = 4.74$ ,  $SD = 1.25$  vs. straight:  $M = 4.51$ ,  $SD = 1.12$ ;  $p = .96$ ).

### Supplementary Materials 3

#### *Correlations - Study 2 and 3*

Table 1. Correlations for Study 2 variables by speakers: correlation for straight-sounding speakers above the diagonal; correlation for gay-sounding speakers below the diagonal.

|                        | 1      | 2      | 3     | 4      | 5      |
|------------------------|--------|--------|-------|--------|--------|
| 1. Warmth              |        | .170   | -.042 | .660** | .627** |
| 2. Competence          | .125   |        | .238* | .161   | .311** |
| 3. Gender typicality   | .027   | -.035  |       | .126   | .213*  |
| 4. Parenting skills    | .618** | .384** | .096  |        | .834** |
| 5. Parental adjustment | .528** | .465** | .223* | .866** |        |

\* $p < .01$ ; \*\* $p < .001$

Table 2. Correlations for Study 3 variables by speakers: correlation for straight-sounding speakers above the diagonal; correlation for gay-sounding speakers below the diagonal.

|                        | 1      | 2      | 3      | 4      |
|------------------------|--------|--------|--------|--------|
| 1. Warmth              |        | .437** | .751** | .592** |
| 2. Competence          | .761** |        | .644** | .617** |
| 3. Parenting skills    | .525** | .584** |        | .875** |
| 4. Parental adjustment | .566** | .479** | .773** |        |

\* $p < .01$ ; \*\* $p < .001$
